# Supplementary material
Source: PubMed Central journal article supplement (PMC5923070)
Supplement: JVI.00090-18_zjv010183529s6.pdf [file JVI.00090-18_zjv010183529s6.pdf]

## Supplemental movie legends

**Movie S1.** Live cell movie demonstrating the spread of BoHV-1 (green) between cells through cellular bridges. Images collected under normal cell culture conditions. MDBK cells were infected with BoHV-1-VP26-GFP mutant at an MOI of 10. Cells were additionally stained using MitoTracker Red for visualization of mitochondria (red). At 8 h.p.i, the cells were analyzed using a Nikon PCM2000 confocal microscope. The movie consist of 100 frames taken over 500 sec (1 frame/5 sec). The scale bar is shown in the bottom right corner.

**Movie S2.** Live cell movie demonstrating the spread of BoHV-1 (green) between cells through tunneling nanotubes. Images collected under normal cell culture conditions. MDBK cells were infected with the BoHV-1-VP26-GFP mutant at an MOI of 10. Cells were additionally stained using MitoTracker Red for visualization of mitochondria (red). At 7,5 h.p.i, the cells were analyzed using a Nikon PCM2000 confocal microscope. The movie consists of 100 frames collected over 500 sec (1 frame/5 sec). The scale bar is shown in the bottom right corner.

**Movie S3.** Two-populations experiment: live cell movie showing transfer of BoHV-1-VP26-GFP through tunneling nanotubes from fibroblasts to KOP cells in the presence of neutralizing antibodies. Red cells : target uninfected KOP cells. Green: bovine fibroblast infected with fluorescent mutant BoHV-1-VP26-GFP. Bovine fibroblasts were seeded on glass bottom dishes and infected with the BoHV-1-VP26-GFP at an MOI of 0,1. At 4 h.p.i, the medium above the cells was replaced with medium containing neutralizing antibodies and uninfected KOP cells stained with Vybrant-DiL (red). Images were captured every 8 sec for 10 h using Leica TCS Sp8 X confocal microscope equipped with an environmental chamber at 37°C and 5% CO<sub>2</sub>. Bright field images were added to visualize the cell morphology.

Selected fragment of the recording is presented. The movie consists of 370 frames collected over 320 min. The relative time is shown in the bottom right corner of the movie, and the scale bar is shown in the bottom left corner.

**Movie S4** . Live cell movie demonstrating the spread of dual-color BoHV-1 mutant between KOP cells through tunneling nanotubes. KOP cells were infected with the BoHV-1-gE-GFP-VP26-mCherry mutant (red – capsid protein VP26, green – glycoprotein E) at an MOI of 0,005. At 1 h.p.i, the medium above the cells was replaced with medium containing neutralizing antibodies. At 24 h.p.i, the cells were analyzed using a Leica TCS Sp8 X confocal microscope equipped with an environmental chamber at 37°C and 5% CO<sub>2</sub>. Images were captured every 10 sec for 10 h. Bright field images were added to visualize the cell morphology. The movie consists of 380 frames collected over 43 min. The relative time is shown in the bottom left corner of the movie, and the scale bar is shown in the bottom right corner.

**Movie S5**. Live cell movie demonstrating the spread of dual-color BoHV-1 mutant between fibroblasts through tunneling nanotubes. Bovine fibroblasts were infected with the BoHV-1-gE-GFP-VP26-mCherry mutant (red – capsid protein VP26, green – glycoprotein E) at an MOI of 0,005. At 1 h.p.i, the medium above the cells was replaced with medium containing neutralizing antibodies. At 12 h.p.i, the cells were analyzed using a Leica TCS Sp8 X confocal microscope equipped with an environmental chamber at 37°C and 5% CO<sub>2</sub>. Images were captured every 18 sec for 10 h. Bright field images were added to visualize the cell morphology. The movie consists of 400 frames collected over 106 min. The relative time is shown in the bottom left corner of the movie, and the scale bar is shown in the bottom right corner.
